# Supplementary material for: Impact of Clinical Markers of Nutritional Status and Feeding Jejunostomy Use on Outcomes in Esophageal Cancer Patients Undergoing Neoadjuvant Chemoradiotherapy
Source: PubMed Central journal article supplement (PMC7602938; doi:10.3390/nu12103177), 2020-10-17
Supplement: nutrients-12-03177-s001.pdf [file nutrients-12-03177-s001.pdf]

**Table S1.** Associations between patient characteristics and markers of nutritional status.

| Covariates          | Albumin change<br>(% of cohort) |       |                 | Weight loss<br>(% of cohort) |      |       |       | J-tube<br>(% of cohort) |     |     |                 |
|---------------------|---------------------------------|-------|-----------------|------------------------------|------|-------|-------|-------------------------|-----|-----|-----------------|
|                     | < 0.5                           | ≥ 0.5 | <i>p</i> -value | Gain                         | < 5% | 5–10% | ≥ 10% | <i>p</i> -value         | Yes | No  | <i>p</i> -value |
| Age < 65            | 46%                             | 54%   | NS              | 10%                          | 36%  | 34%   | 19%   | NS                      | 48% | 52% | NS              |
| Age ≥ 65            | 48%                             | 52%   |                 | 26%                          | 24%  | 38%   | 12%   |                         | 52% | 48% |                 |
| Female              | 40%                             | 60%   | NS              | 20%                          | 40%  | 25%   | 15%   | NS                      | 55% | 45% | NS              |
| Male                | 49%                             | 51%   |                 | 17%                          | 29%  | 38%   | 16%   |                         | 49% | 51% |                 |
| Never smoker        | 36%                             | 64%   | NS              | 15%                          | 36%  | 39%   | 9%    | NS                      | 55% | 45% | NS              |
| Past smoker         | 51%                             | 49%   |                 | 20%                          | 28%  | 34%   | 18%   |                         | 45% | 55% |                 |
| Active smoker       | 52%                             | 48%   |                 | 14%                          | 29%  | 38%   | 19%   |                         | 57% | 43% |                 |
| Path stage 0        | 53%                             | 47%   | NS              | 13%                          | 34%  | 44%   | 9%    | NS                      | 38% | 63% | NS              |
| Path stage 1        | 67%                             | 33%   |                 | 33%                          | 27%  | 27%   | 13%   |                         | 53% | 47% |                 |
| Path stage 2        | 45%                             | 55%   |                 | 23%                          | 23%  | 32%   | 21%   |                         | 53% | 47% |                 |
| Path stage 3        | 38%                             | 63%   |                 | 8%                           | 33%  | 46%   | 13%   |                         | 54% | 46% |                 |
| Path stage 4        | 29%                             | 71%   |                 | 0%                           | 57%  | 14%   | 29%   |                         | 57% | 43% |                 |
| Carbo/Paclitaxel    | 51%                             | 49%   | NS              | 38%                          | 33%  | 27%   | 2%    | <0.001                  | 84% | 16% | <0.001          |
| Cisplatin/5-FU      | 43%                             | 57%   |                 | 8%                           | 26%  | 42%   | 25%   |                         | 31% | 69% |                 |
| Other               | 53%                             | 47%   |                 | 0%                           | 40%  | 40%   | 20%   |                         | 27% | 73% |                 |
| PS 0                | 47%                             | 53%   | NS              | 20%                          | 27%  | 41%   | 12%   | NS                      | 41% | 59% | 0.025           |
| PS 1                | 50%                             | 50%   |                 | 15%                          | 37%  | 29%   | 19%   |                         | 63% | 37% |                 |
| PS ≥ 2 <sup>1</sup> | 33%                             | 67%   |                 | 0%                           | 0%   | 67%   | 33%   |                         | 33% | 67% |                 |
| CCI 0-1             | 48%                             | 51%   | NS              | 16%                          | 32%  | 34%   | 17%   | NS                      | 50% | 50% | NS              |
| CCI >1              | 54%                             | 46%   |                 | 31%                          | 15%  | 46%   | 8%    |                         | 46% | 54% |                 |

NS, nonsignificant; PS, performance status; CCI, Charlson comorbidity index. <sup>1</sup>Only 4 patients had a PS 2 or greater.
